## RESEARCH ARTICLE

## Development of a simple, rapid, and sensitive molecular diagnostic assay for cholera

Subhra Chakraborty<sup>1\*</sup>, Mirza Velagic, Sean Connor

Department of International Health, Johns Hopkins Bloomberg School of Public Health, Baltimore, Maryland, United States of America

\* [schakr11@jhu.edu](mailto:schakr11@jhu.edu)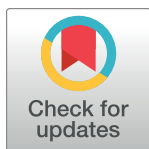

## Abstract

Cholera continues to inflict high rates of morbidity and mortality. Prompt identification of cholera cases facilitates rapid outbreak responses in the short term while providing reliable surveillance data to guide long-term policies and interventions. Microbiological stool culture, the current recognized gold standard for diagnosing cholera, has significant limitations. Rapid diagnostic tests (RDTs) represent promising alternatives for diagnosing cholera in areas with limited laboratory infrastructure. However, studies conducted with the current cholera RDTs demonstrated wide variations in sensitivity and specificity. To address this gap in the diagnosis of cholera, we developed a simple, rapid, and sensitive diagnostic assay, "Rapid LAMP based Diagnostic Test (RLDT)." With a novel, simple sample preparation method directly from the fecal samples along with lyophilized reaction strips and using established Loop-mediated Isothermal Amplification (LAMP) platform, cholera toxin gene (*ctxA*) and O1 (*O1 rfb*) gene could be detected in less than an hour. Cholera RLDT assay is cold chain and electricity-free. To avoid any end-user bias, a battery-operated, handheld reader was used to read the RLDT results. The performance specifications of the cholera RLDT assay, including analytical sensitivity and specificity, were evaluated using direct fecal samples, dried fecal samples on filter paper, and environmental water samples spiked with cholera strain. The limit of detection (LOD) was  $\sim 10^4$  CFU/gm of stool for both *ctxA* and O1 genes, corresponding to about 1 CFU of *Vibrio cholerae* per reaction within 40 minutes. The LOD was 10 bacteria per ml of environmental water when tested with RLDT directly, without enrichment. Being simple, RLDT has the potential to be applied in resource-poor endemic settings for rapid, sensitive, and reliable diagnosis of cholera.

## OPEN ACCESS

**Citation:** Chakraborty S, Velagic M, Connor S (2023) Development of a simple, rapid, and sensitive molecular diagnostic assay for cholera. PLoS Negl Trop Dis 17(2): e0011113. <https://doi.org/10.1371/journal.pntd.0011113>

**Editor:** Jeffrey H. Withey, Wayne State University, UNITED STATES

**Received:** September 21, 2022

**Accepted:** January 19, 2023

**Published:** February 6, 2023

**Copyright:** © 2023 Chakraborty et al. This is an open access article distributed under the terms of the [Creative Commons Attribution License](https://creativecommons.org/licenses/by/4.0/), which permits unrestricted use, distribution, and reproduction in any medium, provided the original author and source are credited.

**Data Availability Statement:** All relevant data are within the manuscript.

**Funding:** Research reported in this publication was partially supported by funding from the National Institute of Allergy and Infectious Diseases (NIAID) of the National Institutes of Health (NIH) under Award Number AI137804 (SC). The content is solely the responsibility of the authors and does not necessarily represent the official views of the NIH, NIAID. The funders had no role in study design, data collection, and analysis, decision to publish, or preparation of the manuscript.

## Author summary

Cholera is an acute diarrheal infection caused by *Vibrio cholerae*. Cholera continues to severely threaten the health of the impoverished and vulnerable populations in the endemic regions. The present laboratory-based cholera detection methods take time and require well-equipped facilities and well-trained staff that are often not available in the resource-poor settings. The available rapid diagnostic tests have a wide range of sensitivity and specificity. A rapid, simple, sensitive, and reliable diagnostic for cholera is required,

**Competing interests:** The authors have declared that no competing interests exist.

which would identify cholera cases early on in outbreaks to facilitate a rapid response and provide reliable surveillance data. We developed a simple, rapid, and sensitive diagnostic assay, "Rapid LAMP based Diagnostic Test (RLDT)," to detect cholera in low-resource settings. Using RLDT, cholera could be detected directly from stool, dried stool on filter paper, and environmental water in less than one hour with minimum hands-on time. The RLDT assay does not require maintaining a cold chain and is electricity-free, facilitating point-of-care testing. The RLDT assay is sensitive, simple to use, and can be scaled up for rapid detection of cholera and surveillance in low-resource endemic settings.

## Introduction

Cholera is an acute, secretory diarrheal disease caused by *Vibrio cholerae* [1,2]. There are an estimated 1.3 to 4.0 million cholera cases annually, leading to 21,000–143,000 deaths [3,4]. Approximately 1.3 billion people living in 69 countries are at risk of contracting the disease [5]. Cholera epidemics have been increasing in frequency, intensity, and duration, indicating more effective approaches to prevention and control are required [6]. Rapid, sensitive, and reliable diagnostic assays are needed to rapidly contain cholera outbreaks and get surveillance data to guide long-term policies and interventions.

The current gold standard for detection of *V. cholerae* is culturing stool or rectal swabs on the selective media [thiosulphate citrate bile salts sucrose (TCBS), or taurocholate-tellurite gelatin agar (TTGA)] either directly or after enrichment in alkaline peptone water (APW), followed by serotyping and bio-typing with antisera [7–9]. The culture method requires competent laboratory support and technical skills, which are not always available at health facilities or laboratories where cholera is endemic. In addition, this method is not sensitive and can take up to 3 days after collection of fecal specimens, which is not ideal for outbreak situations.

Molecular methods like PCR or quantitative PCR are not widely used for cholera diagnostics or surveillance. Several methods are developed by the laboratories, but a standard, validated technique is not yet available. PCR requires trained technicians, a well-equipped laboratory, and a supply of reagents that are not available outside the central laboratories.

Several cholera Rapid Diagnostic Tests (RDTs) have been developed. The commonly used RDTs are based on the lateral flow that detects the lipopolysaccharide of *V. cholerae* O1 and O139 by immunochromatographic assay [10]. Although these tests are well suited to meet the demand for cholera diagnosis in areas where culture or PCR-based methods are not feasible, there are also limitations. A systematic review of diagnostic tests for cholera demonstrated a notable absence of evidence to support the use of these rapid tests [11]. Several studies conducted with Crystal VC, the most widely used RDT, demonstrated suboptimal performance characteristics [9,11]; for example, Crystal VC has demonstrated a wide variation of sensitivity (ranging from 58%–100%) and specificity (ranging from 60%–100%) [11–21]. The performance of Crystal VC improved if tested after enrichment in 1% APW for six hours [22,23]. A study in Haiti [24] which compared Crystal VC, Artron, and SD Bionline RDTs, reported that the performance characteristics of all three RDTs evaluated in this study did not meet the expected minimal performance of a sensitivity of at least 90% and a specificity of at least 85% recommended by the Global Task Force for cholera Control [21].

Cholera is transmitted through water contaminated with *Vibrio cholerae*. We previously adapted the Crystal VC dipstick assay and developed a simple technique for identifying cholera in water samples [25]. However, this assay requires incubation in alkaline peptone water for 24

hours. A rapid and sensitive assay would be valuable to quickly identify if any water sources are contaminated with cholera, and therefore response measures can be taken to contain the transmission.

To address these concerns, we developed a simple and sensitive rapid detection test, "Rapid LAMP-based Diagnostic Test (RLDT)," mostly equipment, cold chain, and electricity-free. We tested the performance specifications including sensitivity, specificity, stability, repeatability, and reproducibility of the cholera RLDT assay using fresh stool, dried stool on filter paper and from environmental water. We believe the RLDT assay has the potential to be applied for cholera case detection and surveillance in patients and water in cholera endemic and epidemic regions of the world.

## Methods

### Optimization of cholera RLDT

The RLDT assay includes a novel sample preparation method and is based on the Loop mediated Isothermal Amplification (LAMP) technology, which is modified to apply to resource-poor settings. The LAMP is an isothermal nucleic acid amplification method first developed by Notomi *et al.* [26]. The LAMP technique is based on auto cycling and high DNA strand displacement activity through repeated elongation reactions occurring at the loop regions [26].

We developed RLDT to detect *V. cholerae* using OmniAmp 2X Isothermal Master Mix (Lucigen, WI). The final concentrations of the reaction mixtures were 1X OmniAmp Mix, 1X LAMP primer mix, 2 mM Fion Green dye (Marker Gene, OR), and 5  $\mu$ L of DNA, with enough molecular grade DNase-RNase-free water added to bring the total reaction volume to 25  $\mu$ L. Primers were designed to target selected regions within the *rfb* gene cluster specific for the O1 lipopolysaccharide of the *V. cholerae* and cholera toxin subunit A (*ctxA*). Since the cholera toxin gene and the heat-labile toxin (LT) gene of enterotoxigenic *E. coli* (ETEC) are similar in their sequence, the primers were designed to detect *ctxA* specifically and not LT. Primer Explorer V5 software was employed to design potential primers from which a set of 3 primer pairs consisting of two outer primers (labeled as forward primer F3 and backward primer B3), two inner primers (labeled as forward inner primer FIP and backward inner primer BIP), and two loop primers (forward loop primer LF and backward loop primer LB) were selected for further testing. Following selection, primer specificity was assessed against sequences in the GenBank database using the National Center for Biotechnology Information's Basic Local Alignment Search Tool (BLAST). The primer sequences, concentrations, and GenBank IDs are shown in Table 1. Optimization experiments were initially performed on a Step One Plus Real-Time PCR System (Applied Biosystems, CA), where amplification was recorded by detecting fluorescence and measured by the instrument software. Time to Result (TTR) calculations were performed by setting the threshold at 4000 reflective fluorescence units (RFU). The amplification reaction was performed at 71 °C for 40 minutes. Later experiments and assays with RLDT kits were performed using a real-time isothermal fluorometer (reader) (AmpliFire, Agdia Inc., IN). To enhance stability and enable storage at ambient temperatures, a complete 1X OmniAmp-LAMP formulation and 10% trehalose (Sigma-Aldrich, MO) was dispensed into 0.2 ml microcentrifuge tubes in strips, and the mixture was lyophilized at the Johns Hopkins University core laboratory using a Labconco FreeZone bench-top lyophilizer (Labconco Corporation, MO). The lyophilized reaction tube (LRT) strips were packaged into light-resistant bags containing a desiccant pouch. While performing the assay, prepared samples were added to LRT strips to rehydrate the reagents and bring the total volume in each tube to 25  $\mu$ L. The strips were placed in the reader to detect O1 *rfb* and *ctxA* target genes.

Table 1. List of cholera RLDT primers used in this study.

| <b>O1rfb</b> |                                                 |                      |
|--------------|-------------------------------------------------|----------------------|
|              | GenBank: X59554                                 |                      |
| Primer Name  | Sequence (5' - 3')                              | Primer Concentration |
| F3           | TCTTCTGCTACCAGTGGCGTAC                          | 0.2 $\mu$ M          |
| B3           | TTCAAGTGGAGCACTTGGGCTA                          | 0.2 $\mu$ M          |
| FIP          | TGCAAAACGGGCGACGTTTAGGCTCGTCGACAGACTCGAGCA      | 1.6 $\mu$ M          |
| BIP          | TGATCCGACAAGCCCAAATGCCACTCGATGTTGAGGCGAAGTTAGGT | 1.6 $\mu$ M          |
| LF           | AACACCTCCTGCATAACTCTTGC                         | 0.8 $\mu$ M          |
| LB           | GCTCGTATTGCGGCGGTAA                             | 0.8 $\mu$ M          |
| <b>ctxA</b>  |                                                 |                      |
|              | GenBank: AF452584                               |                      |
| Primer Name  | Sequence (5' - 3')                              | Primer Concentration |
| F3           | GTTATATCGGGCAGATTCTAG                           | 0.2 $\mu$ M          |
| B3           | GTTTGACCCACTAAGTGG                              | 0.2 $\mu$ M          |
| FIP          | TTTGAGTACCTCGGTCAAAGTACACCTCCTGATGAAATAAAGC     | 1.6 $\mu$ M          |
| BIP          | TGATCATGCAAGAGGAACTCAGATTGAGGTGGAAACATATCC      | 1.6 $\mu$ M          |
| LF           | TCTGTCCTCTTGGCATAAGACCA                         | 0.8 $\mu$ M          |
| LB           | CGGGATTTGTTAGGCACGATGA                          | 0.8 $\mu$ M          |

<https://doi.org/10.1371/journal.pntd.0011113.t001>

### Sample preparation for cholera RLDT

**Stool samples.** We previously developed a simple, rapid, and sensitive method for sample preparation directly from stool to facilitate using the RLDT assay in low resource settings [27]. We adapted the method for the detection of cholera. Stool samples were diluted into an extraction lysis buffer using a sample preparation tube (SPT), and heat lysis was performed to release nucleic acids into the solution prior to amplification (Fig 1). An assay inhibitor control, consisting of the M13mp18 plasmid (New England BioLabs, MA), was included in the extraction buffer, and the lysates were used as templates in the RLDT reactions.

### Dried stool spots on filter paper

We also adapted our previously developed sample preparation method [27] to detect *V. cholerae* from the stool samples dried on filter papers. Fifty microliters of stool samples were placed on Whatman 903 Protein Saver Cards (Millipore, Sigma, MO, USA) and left to dry overnight. The following day, dried samples on the cards were cut out with sterile scissors, added to the SPT tube, and processed as described before directly from the stool (Fig 1).

### Water samples

Four hundred mL of drinking or environmental water samples were filtered through 0.22 $\mu$ m PVDF membranes (Millipore Sigma Durapore, MA, USA) using a syringe (Becton, Dickinson and Company, NJ, USA). The membranes were cut in half using sterilized scissors, and one half was used for RLDT directly. The remaining half was placed in APW for enrichment for overnight at ambient temperature without shaking, followed by culture on TCBS agar. For RLDT, the sample on the PVDF membrane was heat lysed in the lysis tube with extraction lysis buffer and spin down, followed by processing of the supernatant through the SPT tube as described in Fig 2.

### Cholera RLDT kit

The cholera RLDT is prepared as a kit that includes the LRT strips and components required for sample preparation. Each LRT strip has six microcentrifuge tubes, which contain a

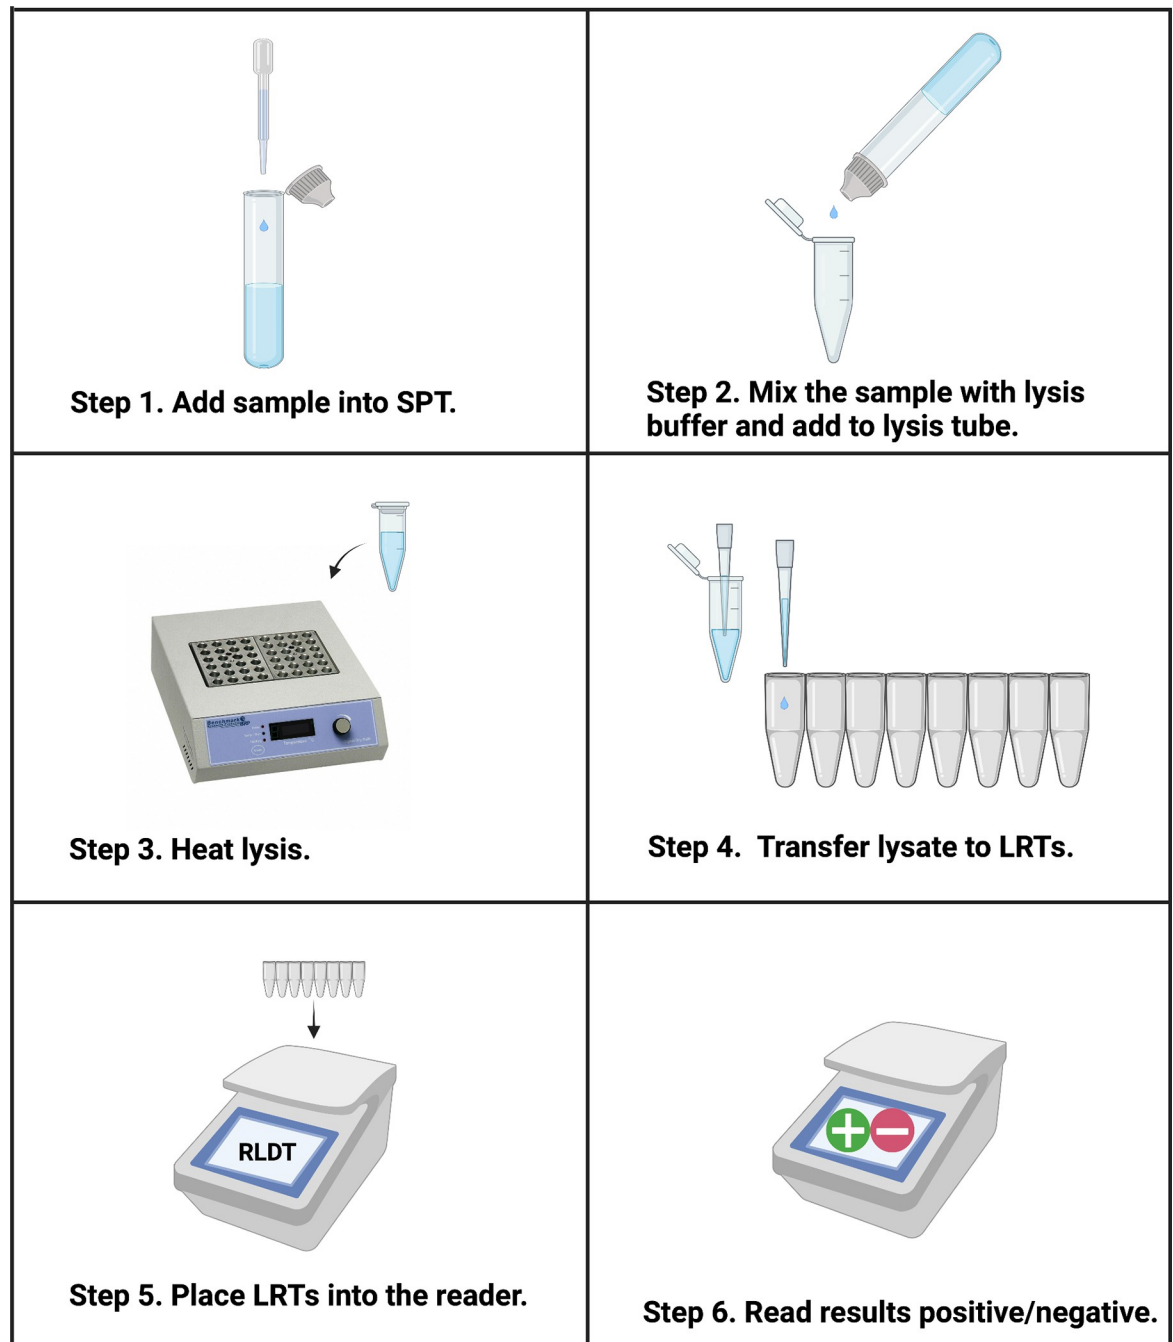

**Fig 1. Workflow of cholera RLDT using RLDT kit.** Step 1, using the fixed volume pipette provided in the kit, add a stool sample to the Sample Processing Tube (SPT) with lysis buffer. Step 2, Cap the SPT tube and mix by inverting the tube up and down. Squeeze the SPT tube to add the lysis buffer + stool sample to the lysis tube. Step 3, lysis tube is heated for 5 minutes in a heat block or water bath. Step 4, add 25  $\mu$ L of lysate to each lyophilized reaction tube (LRT) strip tube using a disposable fixed volume pipette. Step 5, place the LRTs in the reader. Scan the barcode for the cholera RLDT program. Step 6, read the results displayed on the screen real time or after 40 minutes. All the reagents and sample processing accessories required for RLDT are included in the kit. The illustration was created with [BioRender.com](https://www.biorender.com) <https://doi.org/10.1371/journal.pntd.0010180.g001>.

<https://doi.org/10.1371/journal.pntd.0011113.g001>

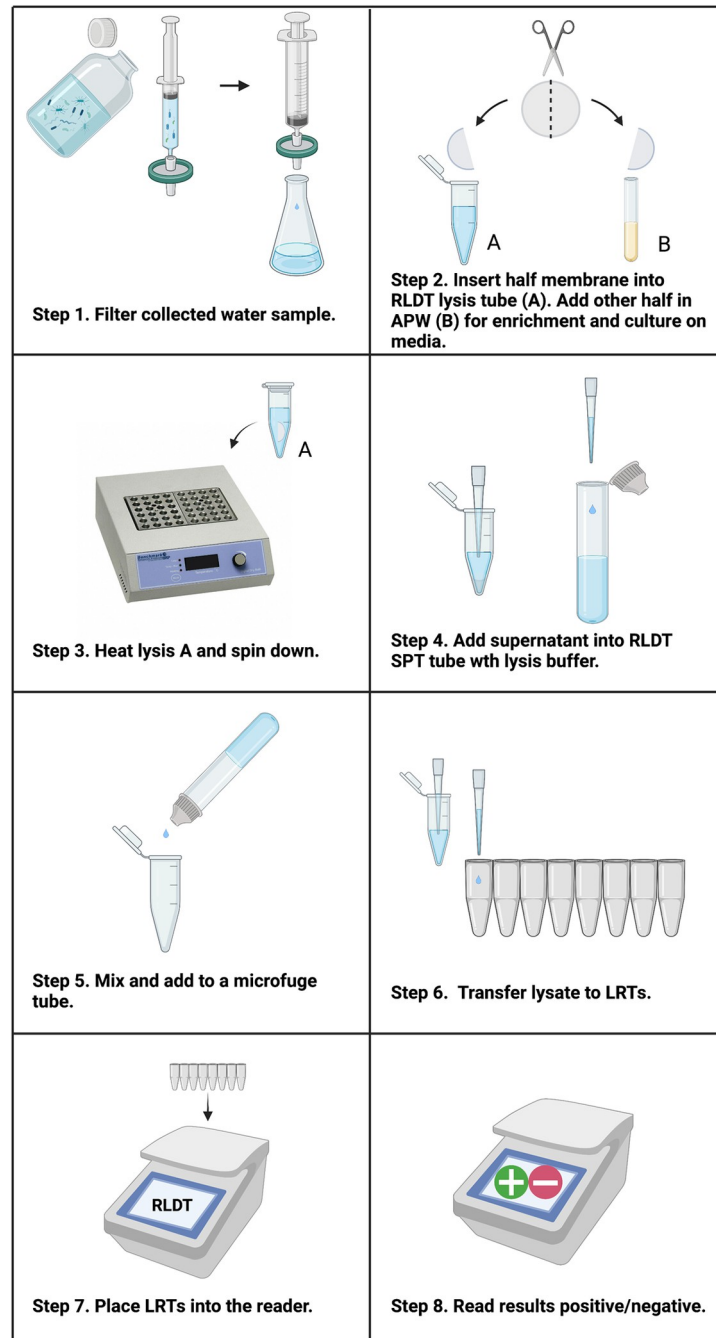

**Fig 2. Workflow of cholera RLDT from water samples.** Step 1, Filter 400ml water using a syringe filter. Step 2, cut membrane in half and insert one half in the lysis tube (A). Place the other half in APW media (B) for overnight enrichment at room temperature followed by culture on TCBS. Step 3, Heat tube A for 5 minutes in a heat block or water bath and spin down. Step 4, Transfer the supernatant from tube A into the SPT. Step 5, Squeeze the SPT tube to add the lysate to the lysis tube. Step 6, Add lysate from the lysis tube to LRTs. Step 7, Place the LRTs in the reader. Scan the barcode for the cholera RLDT program. Step 8, Read results displayed on the screen real time or after 40 minutes. The illustration was created with [BioRender.com](https://BioRender.com).

<https://doi.org/10.1371/journal.pntd.0011113.g002>



lyophilized master mix. The first three microcentrifuge tubes were sequentially filled with the complete master mix targeting the *O1rfb*, *ctxA*, and reaction inhibitor control, while the remaining three microcentrifuge tubes were filled in the same sequential order so that each strip was used to test up to two samples. This arrangement of tubes could be changed to meet the user's needs. For example, only *ctxA* gene and control could be used per sample, and therefore four samples could be tested at once using eight tubes strips.

The fluorometer reader in this study can incubate and read one LRT strip, up to eight targets simultaneously. This device is optimized for isothermal chemistry and allows real-time monitoring of amplification with a touch screen interface, data storage, a rechargeable battery, and handheld portability. The algorithm can be set depending on the need of end users for binary +/- results or in-depth analysis of the real-time amplification. The RLDT assay programs are coded in bar codes and scanned to include in the reader.

### Performance testing of cholera RLDT kit

The *V. cholerae* O1 El Tor strain N16961 was used in performing analytical sensitivity and specificity analysis of RLDT. The strain was cultured in LB broth and incubated at 37°C while shaking for 6 hours. The colony-forming units (CFU) were determined by optical density measurements and quantitative plate counts performed from the culture. Naïve stool samples obtained from the donors negative for cholera were aliquoted and spiked with 10-fold serially diluted cultures of cholera before being processed for RLDT. The spiked serially diluted stool samples were also tested after spotting and dried on filter paper.

For performance testing of cholera RLDT from water, samples were collected from the estuarine Inner Harbor in Baltimore, Maryland. Water samples were spiked with 10-fold serially diluted cultures of N16961 *V. cholerae* strain and processed as described before for RLDT.

### Statistical analysis

The coefficient of variations (CV) was calculated as the ratio of the standard deviation to the mean. All graphs and statistical analyses were performed using GraphPad, CA (Version 9) and Stata Corp LLC (Version 16) software.

## Results

### Performance specifications of cholera RLDT kit

**Detection of cholera from stool samples using cholera RLDT kit.** The analytical sensitivity of cholera RLDT was determined by testing 10-fold serial dilutions of stool samples spiked with *V. cholerae* strain ranging in concentration from 40 to  $4 \times 10^7$  CFU/gm of stool using the RLDT kit. Each dilution was tested ten times. The lowest limit of detection (LOD) was defined as the lowest concentration at which the target gene could be detected in all ten runs. The LOD for the *O1rfb* gene and the *ctxA* gene was  $4 \times 10^4$  CFU/gm of stool (Fig 3). RLDT could detect cholera at a concentration lower than the LOD. At 4000 CFU/gm and 400 CFU/gm, RLDT could detect cholera 6 out of 10 and 1 out of 10 times, respectively.

Analytical specificity was determined by testing reference strains with the cholera RLDT kit (Table 2). No amplification was observed for naïve stool or for pathogens other than the cholera O1 and *ctxA* strains indicating that the cholera RLDT assay is specific. Notably, the ETEC strains with LT were negative by cholera RLDT, showing the RLDT primers are specific for *ctxA*.

Repeatability was tested by performing ten repeats of each of the two stool samples spiked with cholera strain, one with  $10^7$  CFU and the other with  $10^5$  CFU of cholera strain/gm of

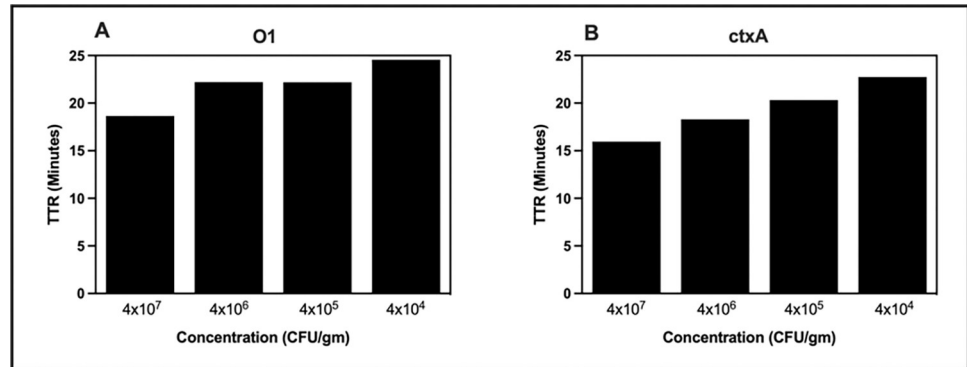

**Fig 3. Lowest detection limit (LOD) of cholera RLDT tested directly from the stool.** Stool samples were spiked with ten-fold serial dilutions of *V. cholerae* N16961. The spiked stool samples were processed and tested with the RLDT kit. LOD was determined as the lowest concentration at which the target gene was detected in all ten runs. A: *O1rfb* gene; B: *ctxA* gene.

<https://doi.org/10.1371/journal.pntd.0011113.g003>

stool. Reproducibility was tested using ten identically spiked stool samples with either 10<sup>7</sup> CFU or 10<sup>5</sup> CFU of cholera strain/gm of stool over three days. We observed positive results for all (100%) of the repeatability and reproducibility assays that were tested. During the repeatability and reproducibility experiments, we determined the % CV of the TTR values of the *ctxA* and *O1rfb* genes which ranged from 4.6% to 6.3% for *ctxA* and 8% to 13.4% for *O1rfb* (Table 3). To understand if cholera RLDT could be used as a semi-quantitative assay, we

**Table 2. List of strains used for the evaluation of the specificity of cholera RLDT.**

| Pathogen/Strain                                         | Source     | O1 | ctxA |
|---------------------------------------------------------|------------|----|------|
| <i>Vibrio cholerae</i> O1 N16961 (El Tor Inaba)         | ATCC       | +  | +    |
| <i>Vibrio cholerae</i> O395 (O1 Classical)              | India      | +  | +    |
| <i>Vibrio cholerae</i> O1 IDH12695 (Ogawa)              | India      | +  | +    |
| <i>Vibrio cholerae</i> IDH00077 (non-O1 and non-O139)   | India      | -  | -    |
| <i>Vibrio cholerae</i> IDH04713 (non-O1 and non-O139)   | India      | -  | -    |
| <i>Vibrio cholerae</i> NT4669 (non-O1 and non-O139)     | India      | -  | -    |
| <i>Vibrio cholerae</i> IDH01793 (non-O1 and non-O139)   | India      | -  | -    |
| <i>Vibrio cholerae</i> O139 IDH00502                    | India      | -  | +    |
| <i>Vibrio cholerae</i> O139 SG24                        | India      | -  | +    |
| <i>Vibrio cholerae</i> O139 OR18                        | India      | -  | +    |
| ETEC H10407 (LT, ST)                                    | WRAIR      | -  | -    |
| ETEC B7A (LT, ST)                                       | WRAIR      | -  | -    |
| ETEC E24377A (LT, ST)                                   | WRAIR      | -  | -    |
| <i>E. coli</i> 25922                                    | ATCC       | -  | -    |
| <i>E. coli</i> 042 (EAEC)                               | ATCC       | -  | -    |
| <i>E. coli</i> 2348/69 (EPEC)                           | ATCC       | -  | -    |
| CR100/C5/RS(C1)                                         | Bangladesh | -  | -    |
| <i>Shigella flexneri</i> 2a 2457T                       | WRAIR      | -  | -    |
| <i>Shigella boydii</i> AMC 4006                         | ATCC       | -  | -    |
| <i>Shigella sonnei</i> 53G                              | WRAIR      | -  | -    |
| <i>Campylobacter jejuni</i> 33291                       | ATCC       | -  | -    |
| <i>Staphylococcus aureus</i>                            | ATCC       | -  | -    |
| <i>Salmonella enterica</i> serovar Typhimurium 700720DQ | ATCC       | -  | -    |

<https://doi.org/10.1371/journal.pntd.0011113.t002>



**Table 3. Variations in cholera RLDT Time to Result (TTR) in repeatability and reproducibility analysis.**

| Targets | TTR CV (%)                      |                                 |                                 |                                 |
|---------|---------------------------------|---------------------------------|---------------------------------|---------------------------------|
|         | Repeatability                   |                                 | Reproducibility                 |                                 |
|         | 10 <sup>7</sup> CFU/gm of stool | 10 <sup>5</sup> CFU/gm of stool | 10 <sup>7</sup> CFU/gm of stool | 10 <sup>5</sup> CFU/gm of stool |
| O1rfb   | 13.4                            | 11.3                            | 8.0                             | 12.3                            |
| ctxA    | 5.9                             | 4.6                             | 5.1                             | 6.3                             |

<https://doi.org/10.1371/journal.pntd.0011113.t003>

analyzed the linearity of the TTR values of *ctxA* gene using serially diluted spiked stool samples. Linearity was established by averaging the TTR over 10 runs of each dilution and plotting the average results. The TTR increased consistently as the concentration of the bacteria in the samples decreased. The R<sup>2</sup> linearity value was 0.999 and the linear regression equation  $y = 2.237x + 13.745$ .

To evaluate the stability of the dry RLDT formulations, the dry LRT strips were incubated at room temperature (~23°C) and 37°C for one year and 42°C for six months and tested at the day 0 and every three months using the RLDT kit. Dry RLDT formulations were stable and functional at ambient temperature and 37°C for one year and 42°C for six months (Fig 4). All the TTRs were within 17 minutes.

### Detection of cholera from dried stool spots on filter paper using cholera RLDT kit

We tested cholera RLDT using serial dilutions stool spiked with *V. cholerae* ranging from 40 to 4 × 10<sup>7</sup> CFU/gm of stool spotted and dried on filter paper and determined the LOD. The

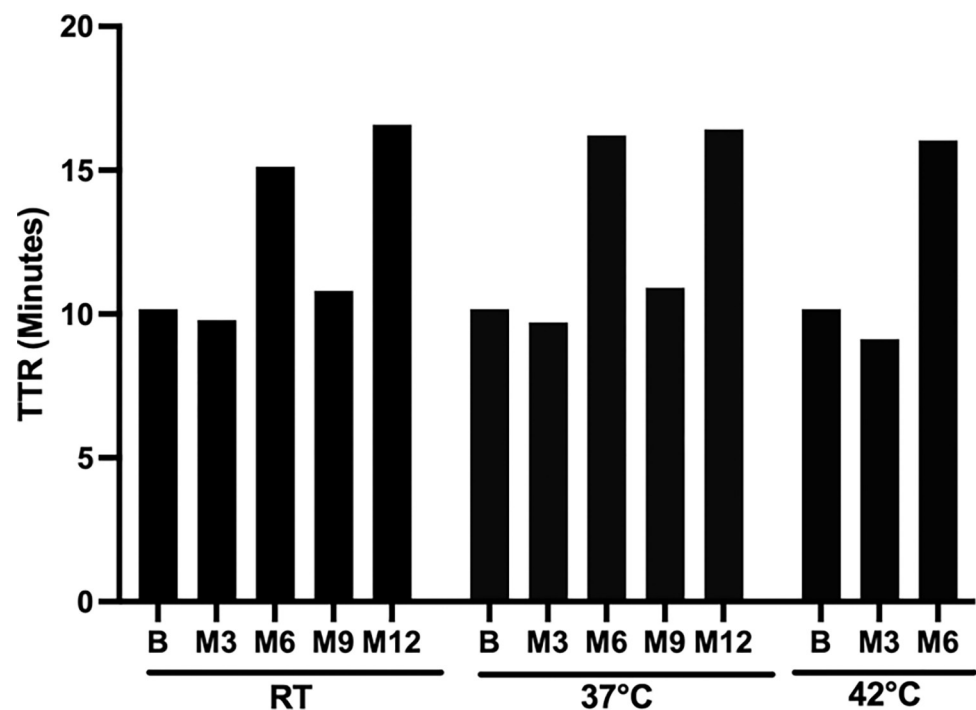

**Fig 4. Stability of the dry cholera RLDT.** The cholera lyophilized reaction tubes (LRT) strips were stored at room temperature (RT), at 37°C, and 42°C. LRT strips were tested using the RLDT kit at three months intervals and the Time to Results (TTR) were recorded.

<https://doi.org/10.1371/journal.pntd.0011113.g004>

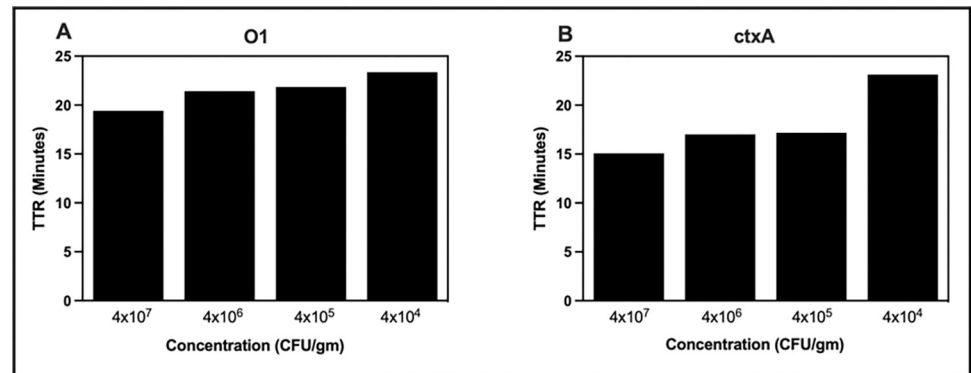

**Fig 5. Lowest Detection Limit (LOD) of cholera RLDT from dried stool on filter paper.** Stool samples were spiked with ten-fold serial dilutions of *V. cholerae* N16961 and 50  $\mu$ L of each dilution was spotted on filter paper. The stool spots were processed and tested with an RLDT kit. LOD was determined. A: *O1rfb* gene; B: *ctxA* gene.

<https://doi.org/10.1371/journal.pntd.0011113.g005>

samples were prepared and tested as previously described. The LOD for the *O1rfb* gene and the *ctxA* gene was  $4 \times 10^4$  CFU/gm (Fig 5). At  $4 \times 10^3$  CFU/gm, RLDT could detect cholera 4 out of 10 times, while cholera could not be detected at a concentration of 400 CFU/gm.

### Detection of cholera from environmental water samples using cholera RLDT kit

We tested cholera RLDT to detect *V. cholerae* in environmental water samples and determined the LOD. Environmental water samples spiked with serial dilutions of *V. cholerae* strains with the concentrations ranging from  $1 \times 10^5$  to  $\sim 1$  bacterium per ml were prepared and tested with RLDT kit directly, without enrichment as previously described. The LOD was 100 CFU/ml of environmental water without enrichment for the *O1rfb* gene and 10 CFU/ml for the *ctxA* gene (Fig 6).

### Advantages of the cholera RLDT

RLDT is performed directly from the stool samples with minimum treatment. Using the rapid sample preparation and dry formulation, the assay is simple. There is a minimum hands-on time of <5 minutes for processing the sample and adding the lysates to the LRTs. The assay

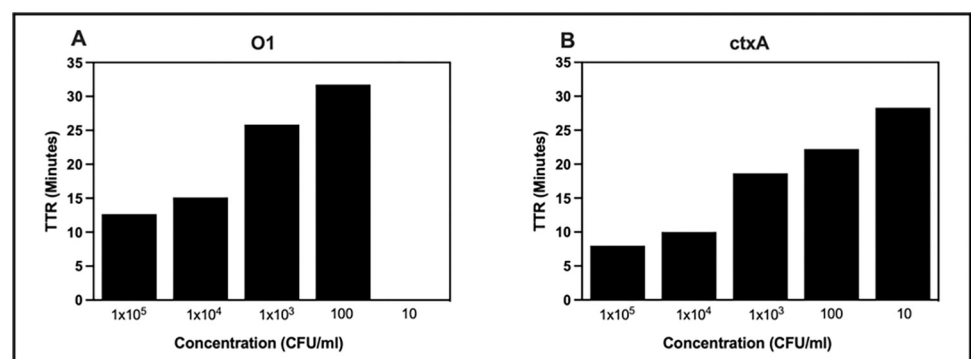

**Fig 6. Lowest detection limit (LOD) of cholera RLDT for environmental water samples.** Environmental water samples were spiked with ten-fold serial dilutions of *V. cholerae* N16961 and processed and tested with an RLDT kit. LOD was determined. A: *O1rfb* gene; B: *ctxA* gene.

<https://doi.org/10.1371/journal.pntd.0011113.g006>

results are read as +/- using a battery-operated handheld reader. The RLDT kit can be stored at ambient temperature and thus can avoid maintaining a cold chain. The RLDT kit provides all the reagents and supplies required and could mitigate the constraints in obtaining reagents, primers, and plastics at the LMICs. The LRTs are already filled with dry reagents and primers, avoids individual addition of each reagent, minimizing contaminations and simplify the process for the users. The assay is rapid, taking <50 minutes from stool to result. As six primers are used for detecting each target, RLDT has high specificity. RLDT only requires a heat block and a reader, which is optional. The assay generates minimum biohazard wastes. The cholera RLDT detects both the O1 and cholera toxin gene and therefore if a new cholera toxigenic strain emerges, will be able to detect immediately. This assay can be performed from stool, dried stool on filter paper, environmental and drinking water.

## Discussion

The novel RLDT assay for detecting cholera is a rapid, simple, and sensitive nucleic acid amplification-based diagnostic assay. RLDT assay could provide a point-of-care diagnostic for cholera in areas with limited access to adequate laboratory infrastructure. This assay was designed for maximum ease of use with transport and storage at ambient temperature. The stool is a difficult substrate because of the presence of inhibitors that could inhibit amplification. We developed a novel technique for a simple, rapid, and minimum hands-on time stool sample processing procedure which maintains high sensitivity of the assay, LOD of  $10^4$  CFU/gm of stool. This LOD is much lower (more sensitive) than the current lateral flow RDTs [9] and similar to the cholera *tcpA* gene in the TaqMan Array Card for enteropathogen detections [28] that has been used in the reanalysis of the samples from the Global Enteric Multicenter Study (GEMS) [29] and the multisite birth cohort study (MAL-ED) [30]. Of note, the TaqMan Array card uses purified DNA, and RLDT is performed directly from the stool.

RLDT could be performed also from stool samples dried on filter papers, which allows storing samples for later testing and, if required, sending samples from remote areas or areas with political conflicts to a better facility.

Environmental reservoirs and contaminated drinking water with *V. cholerae* leave millions at risk of cholera. During cholera outbreaks, promptly identifying the contaminated water source could prevent numerous additional infections and thus could save lives. With RLDT, cholera could be detected from the environmental or drinking water with high sensitivity within an hour.

Unlike the current lateral flow assays [10,11] which only detects O1 and O139 antigens, the cholera RLDT detects both the O1 and cholera toxin genes and therefore if a new toxigenic cholera strain emerges (as O139 cholera strain emerged and caused pandemic), will be able to detect immediately.

The cholera RLDT assay is made in a dry format where all the reagents are lyophilized, which avoids maintaining a cold chain during shipment and storage. This dry format also avoids handling individual reagents by the end users, who only need to add the processed sample to the LRT strips. RLDT kit includes all the reagents and plastics required for the assay, which minimizes the difficulty of procuring reagents and plastics by the end users, which is often a challenge in endemic countries.

As LAMP, the RLDT results can be read by the naked eye or using a UV illuminator. To avoid end-user bias when using the assay by the hospital staff or in the field or at the community level by the technicians with minimum or no laboratory training, we preferred to use the handheld battery-powered fluorometer reader, which can read the results as positive or negative. Although this equipment adds additional cost to the assay, it is only a one-time primary

investment and could be used for RLDT assays for other pathogens, that we developed [27,31,32].

Although, RLDT is a qualitative test, the TTR of RLDT has a linear relation with the CFU of the bacteria per gram of stool. Thus, RLDT can semi-quantify the number of the target bacteria in the stool.

Since RLDT assay is rapid, stool samples that are positive by RLDT for cholera, could be sent to the laboratory for culture on the same day to isolate colonies for downstream characterization of the strains, e.g., whole genome sequencing.

Several LAMP-based assays were developed previously in the laboratories for the diagnosis of cholera [9,33–43]. The stool is a complex sample to extract DNA and amplify because of the presence of inhibitors. The LAMP assays previously developed to detect cholera from stool are either from colonies isolated from culturing the stool or from purified DNA extracted from stool with commercial kits or a complex process that is not feasible at low resource settings. In addition, these assays require maintaining a cold chain, which is difficult to achieve in these settings. RLDT has addressed these issues and adapted LAMP to be more applicable to the endemic settings where it is most needed. One could backpack the RLDT kit and the reader to perform the assay in a cholera outbreak setting to facilitate rapid results with high sensitivity and specificity.

In conclusion, cholera RLDT has several advantages, including rapid results, simple operating procedures, easy readout of the results, and high analytical sensitivity, equivalent to quantitative PCR. In addition, RLDT is electricity and cold-chain-free. All these qualities make RLDT easy to scale up and appropriate to use in endemic settings. RLDT assay for detection of ETEC was feasible to implement in an endemic country setting, Zambia [32].

Field evaluations of cholera RLDT are currently underway in the South Asian and African countries to determine the feasibility of applying this assay in the endemic settings and compare the performance of the RLDT to the reference diagnostic assays of cholera.

## Acknowledgments

We thank Xueyan Zhang and Jessica Brubaker for their valuable contributions.

## Author Contributions

**Conceptualization:** Subhra Chakraborty.

**Data curation:** Subhra Chakraborty, Mirza Velagic, Sean Connor.

**Formal analysis:** Mirza Velagic.

**Funding acquisition:** Subhra Chakraborty.

**Investigation:** Mirza Velagic, Sean Connor.

**Methodology:** Subhra Chakraborty, Mirza Velagic, Sean Connor.

**Project administration:** Subhra Chakraborty, Mirza Velagic.

**Resources:** Subhra Chakraborty.

**Software:** Mirza Velagic.

**Supervision:** Subhra Chakraborty.

**Validation:** Subhra Chakraborty, Mirza Velagic.

**Visualization:** Subhra Chakraborty.

**Writing – original draft:** Subhra Chakraborty, Mirza Velagic.

**Writing – review & editing:** Subhra Chakraborty, Mirza Velagic, Sean Connor.

## References

1. Morris JG Jr, Acheson D. Cholera and other types of vibriosis: a story of human pandemics and oysters on the half shell. *Clin Infect Dis*. 2003; 37(2):272–80. <https://doi.org/10.1086/375600> PMID: 12856219
2. Sack DA, Sack RB, Nair GB, and Siddique AK. Cholera. *Lancet*. 2004; 363(9404):223–233. [https://doi.org/10.1016/s0140-6736\(03\)15328-7](https://doi.org/10.1016/s0140-6736(03)15328-7) PMID: 14738797
3. World Health Organization. Cholera [Internet]. [cited 2022 August 16]. Available from: [https://www.who.int/health-topics/cholera#tab=tab\\_1](https://www.who.int/health-topics/cholera#tab=tab_1)
4. Global Task Force on Cholera Control. About cholera [Internet]. [cited 2022 August 16]. Available from: <https://www.gtfcc.org/about-cholera/>
5. Ali M, Nelson AR, Lopez AL, Sack DA. Updated global burden of cholera in endemic countries. *PLoS Negl Trop Dis*. 2015; 9(6):e0003832. <https://doi.org/10.1371/journal.pntd.0003832> PMID: 26043000
6. Harris J. F, Ryan ET, and Calderwood SB. Cholera. *Lancet*. 2012; 379(9835):2466–2476. [https://doi.org/10.1016/S0140-6736\(12\)60436-X](https://doi.org/10.1016/S0140-6736(12)60436-X) PMID: 22748592
7. Centers for Disease Control and Prevention. Laboratory Methods for the Diagnosis of Epidemic Dysentery and Cholera. CDC. 1999. Available from: <https://stacks.cdc.gov/view/cdc/6669>
8. Telesmanich NR, IuM L. Laboratory diagnosis of cholera: analysis and prospects for improvement. *Klin Lab Diagn*. 2009; 11:51–55. PMID: 20030273
9. Ramamurthy T, Das B, Chakraborty S, Mukhopadhyay AK, Sack DA. Diagnostic techniques for rapid detection of *Vibrio cholerae* O1/O139. *Vaccine*. 2020; 38 Suppl 1:A73–A82. <https://doi.org/10.1016/j.vaccine.2019.07.099> PMID: 31427135
10. Tarh JE. A Review on Diagnostic Methods for the Identification of *Vibrio cholerae*. *J Adv Med Med Res*. 2020;136–64. <https://doi.org/10.9734/jammr/2020/v32i830474>
11. Dick MH, Guillemin M, Moussy F, Chaignat CL. Review of two decades of cholera diagnostics—how far have we really come?. *PLoS Negl Trop Dis*. 2012; 6(10): e1845. <https://doi.org/10.1371/journal.pntd.0001845> PMID: 23071851
12. Hasan JA, Huq A, Tamplin ML, Siebeling RJ, Colwell RR. A novel kit for rapid detection of *Vibrio cholerae* O1. *J Clin Microbiol*. 1994; 32(1):249–52. <https://doi.org/10.1128/jcm.32.1.249-252.1994> PMID: 8126193
13. Qadri F, Hasan JA, Hossain J, Chowdhury A, Begum YA, Azim T, et al. Evaluation of the monoclonal antibody-based kit Bengal SMART for rapid detection of *Vibrio cholerae* O139 synonym Bengal in stool samples. *J Clin Microbiol*. 1995; 33(3):732–734. <https://doi.org/10.1128/jcm.33.3.732-734.1995> PMID: 7751386
14. Kalluri P, Naheed A, Rahman S, Ansaruzzaman M, Faruque AS, Bird M, et al. Evaluation of three rapid diagnostic tests for cholera: does the skill level of the technician matter?. *Trop Med Int Health*. 2006; 11(1):49–55. <https://doi.org/10.1111/j.1365-3156.2005.01539.x> PMID: 16398755
15. Harris JR, Cavallaro EC, De Nóbrega AA, Dos S. Barrado JC, Bopp C, Parsons MB, et al. Field evaluation of Crystal VC Rapid Dipstick test for cholera during a cholera outbreak in Guinea-Bissau. *Trop Med Int Health*. 2009; 14(9):1117–1121. <https://doi.org/10.1111/j.1365-3156.2009.02335.x> PMID: 19624473
16. Mukherjee P, Ghosh S, Ramamurthy T, Bhattacharya MK, Nandy RK, Takeda Y, et al. Evaluation of a rapid immunochromatographic dipstick kit for diagnosis of cholera emphasizes its outbreak utility. *Jpn J Infect Dis*. 2010; 63(4):234–238. PMID: 20657061
17. Page AL, Alberti KP, Mondonge V, Rauzier J, Quilici ML, Guerin PJ. Evaluation of a rapid test for the diagnosis of cholera in the absence of a gold standard. *PLoS One*. 2012; 7(5):e37360. <https://doi.org/10.1371/journal.pone.0037360> PMID: 22666350
18. Ley B, Khatib AM, Thriemer K, Von Seidlein L, Deen J, Mukhopadhyay A, et al. Evaluation of a rapid dipstick (Crystal VC) for the diagnosis of cholera in Zanzibar and a comparison with previous studies. *PLoS One*. 2012; 7(5):e36930. <https://doi.org/10.1371/journal.pone.0036930> PMID: 22662131
19. Sinha A, Sengupta S, Ghosh S, Basu S, Sur D, Kanungo S, et al. Evaluation of a rapid dipstick test for identifying cholera cases during the outbreak. *Indian J Med Res*. 2012; 135(4):523–528. PMID: 22664501
20. Boncy J, Rossignol E, Dahourou G, Hast M, Buteau J, Stanislas M, et al. Performance and utility of a rapid diagnostic test for cholera: notes from Haiti. *Diagn Microbiol Infect Dis*. 2013; 76(4):521–523. <https://doi.org/10.1016/j.diagmicrobio.2013.03.010> PMID: 23886437

21. Global Task Force on Cholera Control. Interim Technical Note: The Use of Cholera Rapid Diagnostic Tests. GTFCC. 2016. Available from: <https://www.gtfcc.org/wp-content/uploads/2019/10/gtfcc-interim-use-of-cholera-rapid-diagnostic-tests.pdf>
22. Bwire G, Malimbo M, Maskery B, Kim YE, Mogasale V, Levin A. The burden of cholera in Uganda. *PLoS Negl Trop Dis*. 2013; 7(12):e2545. <https://doi.org/10.1371/journal.pntd.0002545> PMID: 24340106
23. Ontweka LN, Deng LO, Rauzier J, Debes AK, Tadesse F, Parker LA, et al. Cholera rapid test with enrichment step has diagnostic performance equivalent to culture. *PLoS One*. 2016; 11(12):e0168257. <https://doi.org/10.1371/journal.pone.0168257> PMID: 27992488
24. Matias WR, Julceus FE, Abelard C, Mayo-Smith LM, Franke MF, Harris JB, et al. Laboratory evaluation of immunochromatographic rapid diagnostic tests for cholera in Haiti. *PLoS One*. 2017; 12(11):e0186710. <https://doi.org/10.1371/journal.pone.0186710> PMID: 29091945
25. Chakraborty S, Alam M, Scobie HM, Sack DA. Adaptation of a simple dipstick test for detection of *Vibrio cholerae* O1 and O139 in environmental water. *Front Microbiol*. 2013; 4:320–320. <https://doi.org/10.3389/fmicb.2013.00320> PMID: 24194737
26. Notomi T., Okayama H., Masubuchi H., Yonekawa T., Watanabe K., Amino N., et al. Loop-mediated isothermal amplification of DNA. *Nucleic Acids Res*. 2000; 28(12):E63 <https://doi.org/10.1093/nar/28.12.e63> PMID: 10871386
27. Chakraborty S, Connor S, Velagic M. Development of a simple, rapid, and sensitive diagnostic assay for enterotoxigenic *E. coli* and *Shigella* spp applicable to endemic countries. *PLoS Negl Trop Dis*. 2022; 16(1):e0010180. <https://doi.org/10.1371/journal.pntd.0010180> PMID: 35089927
28. Liu J, Gratz J, Amour C, Kibiki G, Becker S, Janaki L, et al. A laboratory-developed TaqMan Array Card for simultaneous detection of 19 enteropathogens. *J Clin Microbiol*. 2013; 51(2):472–480. <https://doi.org/10.1128/JCM.02658-12> PMID: 23175269
29. Liu J, Platts-Mills JA, Juma J, Kabir F, Nkeze J, Okoi C, et al. Use of quantitative molecular diagnostic methods to identify causes of diarrhoea in children: a reanalysis of the GEMS case-control study. *Lancet*. 2016; 388(10051):1291–1301. [https://doi.org/10.1016/S0140-6736\(16\)31529-X](https://doi.org/10.1016/S0140-6736(16)31529-X) PMID: 27673470.
30. Platts-Mills JA, Liu J, Rogawski ET, Kabir F, Lertsethtakarn P, Sigua M, et al. Use of quantitative molecular diagnostic methods to assess the aetiology, burden, and clinical characteristics of diarrhoea in children in low-resource settings: a reanalysis of the MAL-ED cohort study. *Lancet Glob Health*. 2018; 6(12):e1309–18. [https://doi.org/10.1016/S2214-109X\(18\)30349-8](https://doi.org/10.1016/S2214-109X(18)30349-8) PMID: 30287127
31. Connor S, Velagic M, Zhang X, Johura FT, Chowdhury G, Mukhopadhyay AK, et al. Evaluation of a simple, rapid and field-adapted diagnostic assay for enterotoxigenic *E. coli* and *Shigella*. *PLoS Negl Trop Dis*. 2022; 16(2):e0010192. <https://doi.org/10.1371/journal.pntd.0010192> PMID: 35130310
32. Suwilanji S, Chilyabanyama ON, Liswaniso F, Chisenga CC, Chilengi R, Gordon D, et al. Field evaluation of a novel, rapid diagnostic assay and molecular epidemiology of enterotoxigenic *E. coli* among Zambian children presenting with diarrhea. *PLoS Negl Trop Dis*. 2022; 16(2):e0010207. <https://doi.org/10.1371/journal.pntd.0010207> PMID: 35930612
33. Yamazaki W, Seto K, Taguchi M, Ishibashi M, Inoue K. Sensitive and rapid detection of cholera toxin-producing *Vibrio cholerae* using a loop-mediated isothermal amplification. *BMC Microbiol*. 2008; 8(1):94. <https://doi.org/10.1186/1471-2180-8-94> PMID: 18547441
34. Okada K, Chantaroj S, Taniguchi T, Suzuki Y, Roobthaisong A, Puiprom O, et al. A rapid, simple, and sensitive loop-mediated isothermal amplification method to detect toxigenic *Vibrio cholerae* in rectal swab samples. *Diagn Microbiol Infect Dis*. 2010; 66(2):135–139. <https://doi.org/10.1016/j.diagmicrobio.2009.09.004> PMID: 19815364
35. Srisuk C, Chaivisuthangkura P, Rukpratanporn S, Longyant S, Sridulyakul P, Sithigorngul P. Rapid and sensitive detection of *Vibrio cholerae* by loop-mediated isothermal amplification targeted to the gene of outer membrane protein ompW. *Lett Appl Microbiol*. 2010; 50(1):36–42. <https://doi.org/10.1111/j.1472-765X.2009.02749.x> PMID: 19874480
36. Soli KW, Kas M, Maure T, Umezaki M, Morita A, Siba PM, et al. Evaluation of colorimetric detection methods for *Shigella*, *Salmonella*, and *Vibrio cholerae* by loop-mediated isothermal amplification. *Diagn Microbiol Infect Dis*. 2013; 77(4):321–323. <https://doi.org/10.1016/j.diagmicrobio.2013.09.009> PMID: 24157057
37. Syafirah EE, Najjan AN, Foo PC, Ali MR, Mohamed M, Yean CY. An ambient temperature stable and ready-to-use loop-mediated isothermal amplification assay for detection of toxigenic *Vibrio cholerae* in outbreak settings. *Acta Trop*. 2018; 182:223–231. <https://doi.org/10.1016/j.actatropica.2018.03.004> PMID: 29545156
38. Izumiya H, Morita M, Arakawa E, Ngo TC, Nguyen HT, Nguyen DT, et al. Development of a loop-mediated isothermal amplification assay for *Vibrio cholerae* O1 and O139. *Mol Cell Probes*. 2019; 45:65–67. <https://doi.org/10.1016/j.mcp.2019.05.001> PMID: 31082474



39. Soleimani M, Roozbehani AD, Majidzadeh K. Simple and Sensitive Quantification of Toxigenic *Vibrio cholerae* DNA by Real-Time Loop-Mediated Isothermal Amplification Based on *ctxB* Gene. *Ann Mil Health Sci Res.* 2019; 17(2):e94703. <https://doi.org/10.5812/amh.94703>
40. Xu M, Fu H, Chen D, Shao Z, Zhu J, Alali WQ, et al. Simple visualized detection method of virulence-associated genes of *Vibrio cholerae* by loop-mediated isothermal amplification. *Front Microbiol.* 2019; 10:2899. <https://doi.org/10.3389/fmicb.2019.02899> PMID: 31921074
41. Mousavi SM, Zeinoddini M, Saeedinia AR, Xodadadi N. Specific and Rapid Detection of Zonula Occludens Toxin-producing *Vibrio Cholerae* Using LAMP. *Biomacromol J.* 2020; 6(2):139–146.
42. Chamanrokh P, Colwell RR, Huq A. Loop-mediated isothermal amplification (LAMP) assay for rapid detection of viable but non-culturable *Vibrio cholerae* O1. *Can J Microbiol.* 2022; 68(2):103–110. <https://doi.org/10.1139/cjm-2021-0142> PMID: 34793252
43. Chen D, Liang Z, Ren S, Alali W, Chen L. Rapid and visualized detection of virulence-related genes of *Vibrio cholerae* in water and aquatic products by loop-mediated isothermal amplification. *J Food Prot.* 2022; 85(1):44–53. <https://doi.org/10.4315/JFP-21-182> PMID: 34436566.
